# Supplementary material
Source: MDPI journal article supplement (https://www.mdpi.com/2073-4441/12/5/1249)
Supplement: s1 [file s1]

## Supplementary Material

General, a zero-order rate expression  $r_F$  can be seen as a product of a rate constant  $k_{0,F}$  and active biomass  $X_H$  [36]. If no substrate is present, this rate expression equals the endogenous oxygen uptake rate  $OUR_e$ :

$$r_F = k_{0,F} \cdot X_H = OUR_e \text{ [g} \cdot \text{m}^{-3} \cdot \text{d}^{-1}] \quad (1)$$

With this in mind, a critical characteristic length  $L_{crit}$  of the biofilm can be expressed with Equation (2). For a detailed derivation of the equations, see [36].

$$L_{crit} = \sqrt{\frac{D_F}{OUR_e}} \text{ [mm]} \quad (2)$$

With  $D_F$  as diffusion coefficient in the biofilm [ $\text{m}^2 \cdot \text{d}^{-1}$ ]. For oxygen, the  $D_F$  can be set as  $2.1 \cdot 10^{-4} \text{m}^2 \cdot \text{d}^{-1}$ . Regarding typical  $OUR_e$  within the monitored range of  $18\text{--}2 \text{ g} \cdot \text{m}^{-3} \cdot \text{d}^{-1}$ , a critical length  $L_{crit}$  of  $1.0\text{--}1.9 \text{ mm}$  results. The used biofilm carrier showed a biofilm thickness  $L_F$  of  $6.0\text{--}8.0 \text{ mm}$ . Therefore, the quotient  $L_F/L_{crit}$  is above 4, which is indicating a mass transport limitation within the biofilm [36]. The penetration depth  $\beta L_F$  is expressed with Equation (3):

$$\beta L_F = \sqrt{\frac{2 \cdot C_{O_2} \cdot D_F}{k_0 \cdot X_H}} \text{ [mm]} \quad (3)$$

With  $C_{O_2}$  [ $\text{g} \cdot \text{m}^{-3}$ ] as concentration in the liquid phase, here oxygen. Again, replacing the rate expression with the oxygen uptake rate results in Equation (4):

$$\beta L_F = \sqrt{\frac{2 \cdot C_{O_2} \cdot D_F}{OUR_e}} \text{ [mm]} \quad (4)$$

The range of oxygen during the aerobic batch experiments was between 2 and  $4 \text{ g} \cdot \text{m}^{-3}$ . The comparison of biofilm thickness and oxygen penetration is presented in **Error! Reference source not found.** Concerning a decrease of the endogenous  $OUR$  with time due to a degradation of  $X_H$ , the oxygen penetration depth slightly increases with time. However, there is still a gap of  $1.5 \text{ mm}$  between oxygen penetration and minimal biofilm thickness which can be seen as anaerobic.

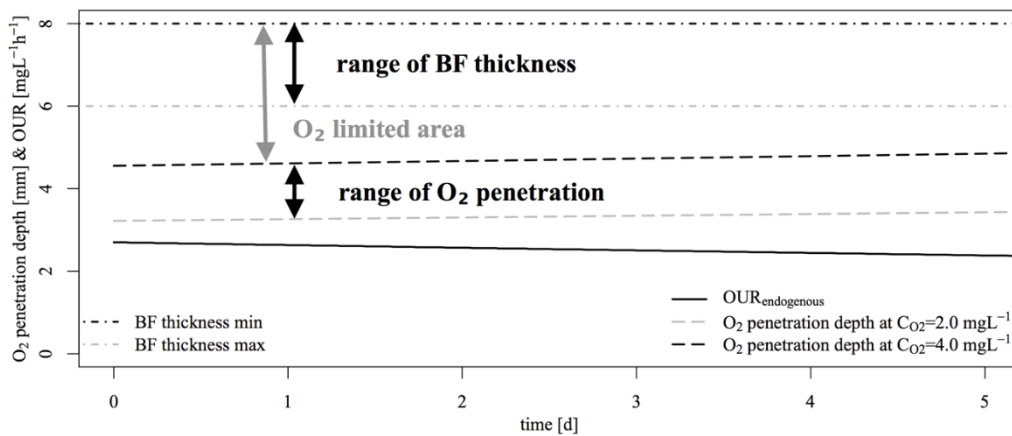

**Figure S1.** Diffusion limitation with respect of oxygen penetration into the biofilm.

## References

1. Morgenroth, E. Modelling Biofilms. In *Biological Wastewater Treatment: Principles, Modelling and Design*; Henze, M., van Loosdrecht, M.C.M., Ekama, G.A., Brdjanovic, D., Eds.; 2008; pp. 456–492.
